# Supplementary material for: Evaluation of Anti-Oxinflammatory and ACE-Inhibitory Properties of Protein Hydrolysates Obtained from Edible Non-Mulberry Silkworm Pupae (Antheraea assama and Philosomia ricinii)
Source: MDPI journal article supplement (doi:10.3390/nu15041035), 2023-02-19

### **Supplementary Data**

**Novel peptides purification from edible pupae hydrolysate of *Antheraea assama* “Muga” and *Philosomia ricinii* “Eri”: angiotensin-I converting enzyme (ACE) inhibition and anti-inflammatory potency in LPS stimulated HUVECs cell line**

**Evaluation of antioxi-inflammatory and ACE-inhibitory properties of protein hydrolysates obtained from non-mulberry silkworm pupae (*Antheraea assama* and *Philosomia ricinii*)**

Preeti Sarkar<sup>a</sup>, Alessandra Pecorelli<sup>b,c</sup>, Brittany Woodby<sup>c</sup>, Erika Pambianchi<sup>c</sup>, Francesca Ferrara<sup>c,d</sup>, Raj Kumar Duary<sup>a,g\*</sup>, Giuseppe Valacchi<sup>b,c,e,\*</sup>,

<sup>a</sup>Department of Food Engineering and Technology, School of Engineering, Tezpur University, Assam, India.

<sup>b</sup>Department. of Environmental Sciences and Prevention, University of Ferrara, Ferrara, Italy.

<sup>c</sup>Plants for Human Health Institute, NC Research Campus, NC State University, NC, USA.

<sup>d</sup>Department of Neuroscience and Rehabilitation, University of Ferrara, Ferrara, Italy.

<sup>e</sup>Department of Food and Nutrition, Kyung Hee University, Seoul, South Korea.

<sup>g</sup>Department of Dairy Science & Food Technology, Institute of Agricultural Sciences, Banaras Hindu University (BHU), Varanasi, U.P., India.

**\*Corresponding authors:** Professor Giuseppe Valacchi, E-mail address: gvalacc@ncsu.edu, Professor Raj Kumar Duary, E-mail address: rkduary@bhu.ac.in,

**Figure. S1:** Correlation and regression analysis of degree of hydrolysis (%) with ACE inhibition activities (%) obtained with Muga pupae derived hydrolysates (A) and Eri pupae derived hydrolysates (B).

**A**

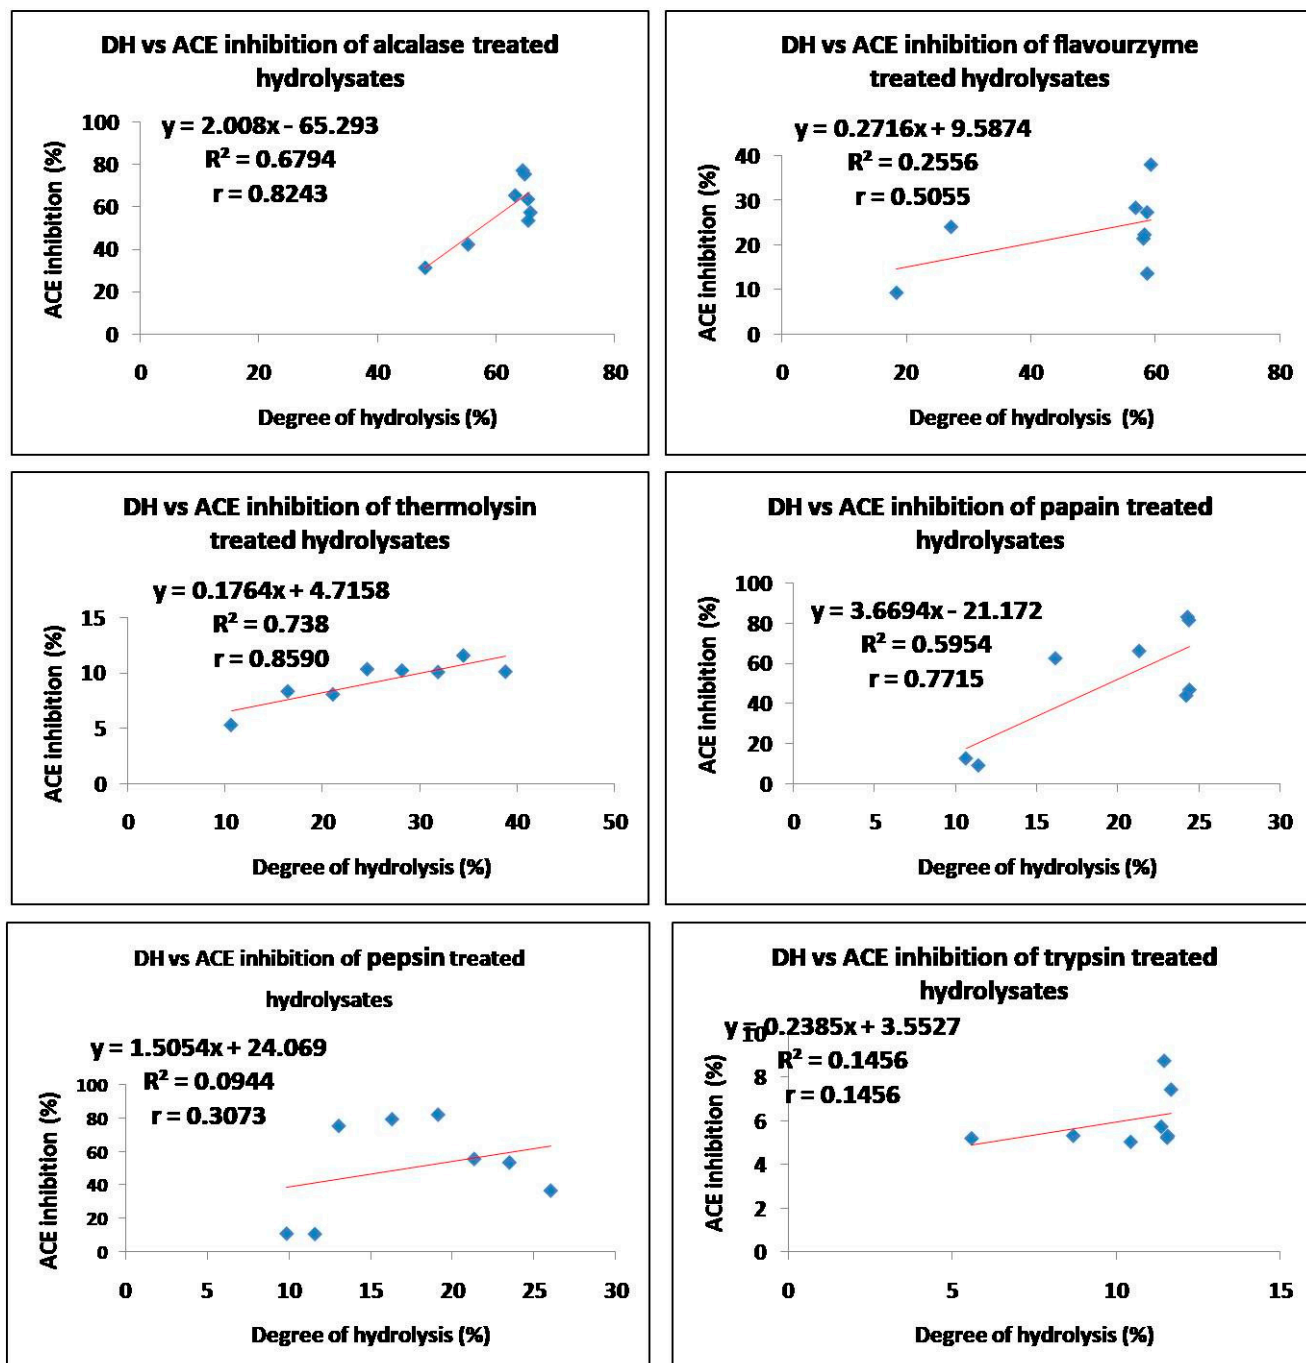

# B

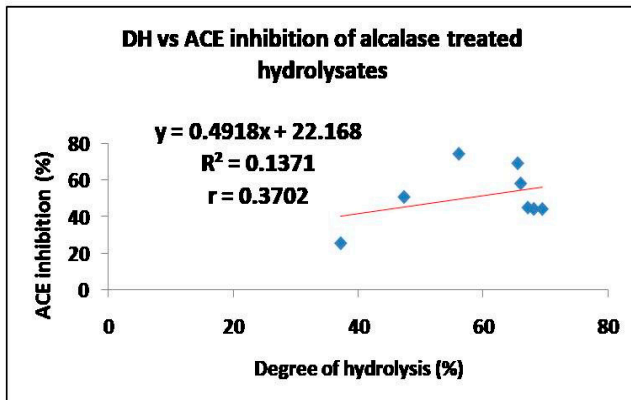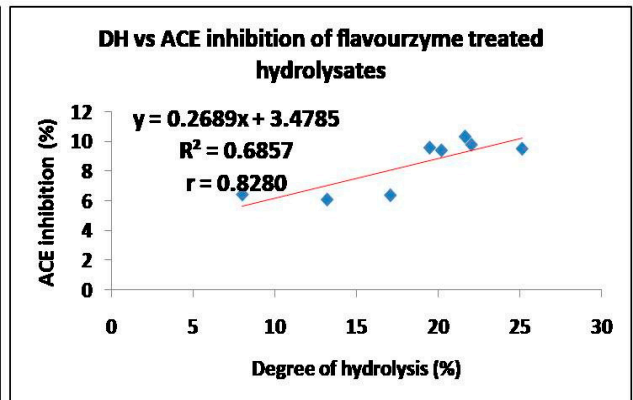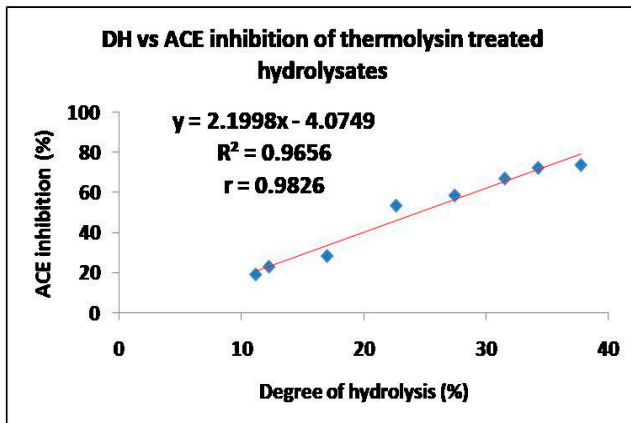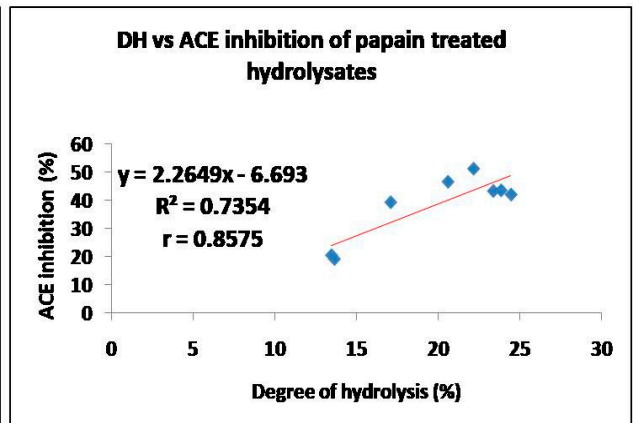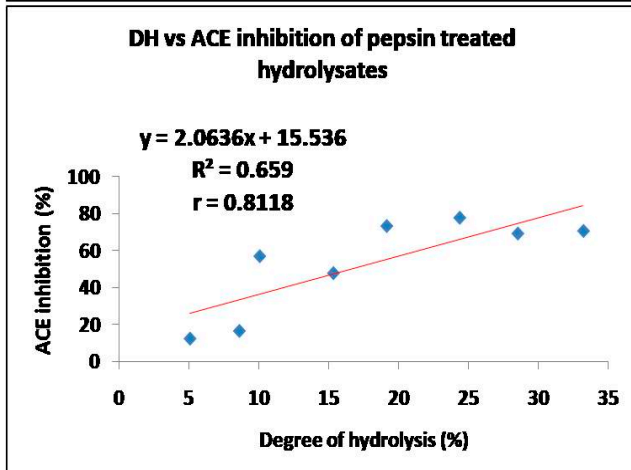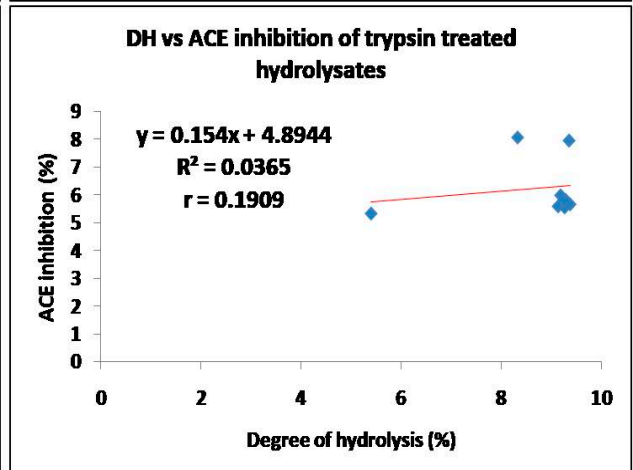

Supplement: s1 [file s1]
